# Supplementary material for: A Real-World Evidence Study Using Alberta-Population-Based Data to Describe Treatment Patterns for Metastatic Castration-Sensitive Prostate Cancer Patients (AWARENESS)
Source: MDPI journal article supplement (doi:10.3390/curroncol30090591), 2023-09-01

**Supplemental Figure S1.** Kaplan Meier Curve for Overall Survival for all patients, patients in cohort 1 (ADT alone), and patients in cohorts 2-5 (ADT plus additional life prolonging therapies)

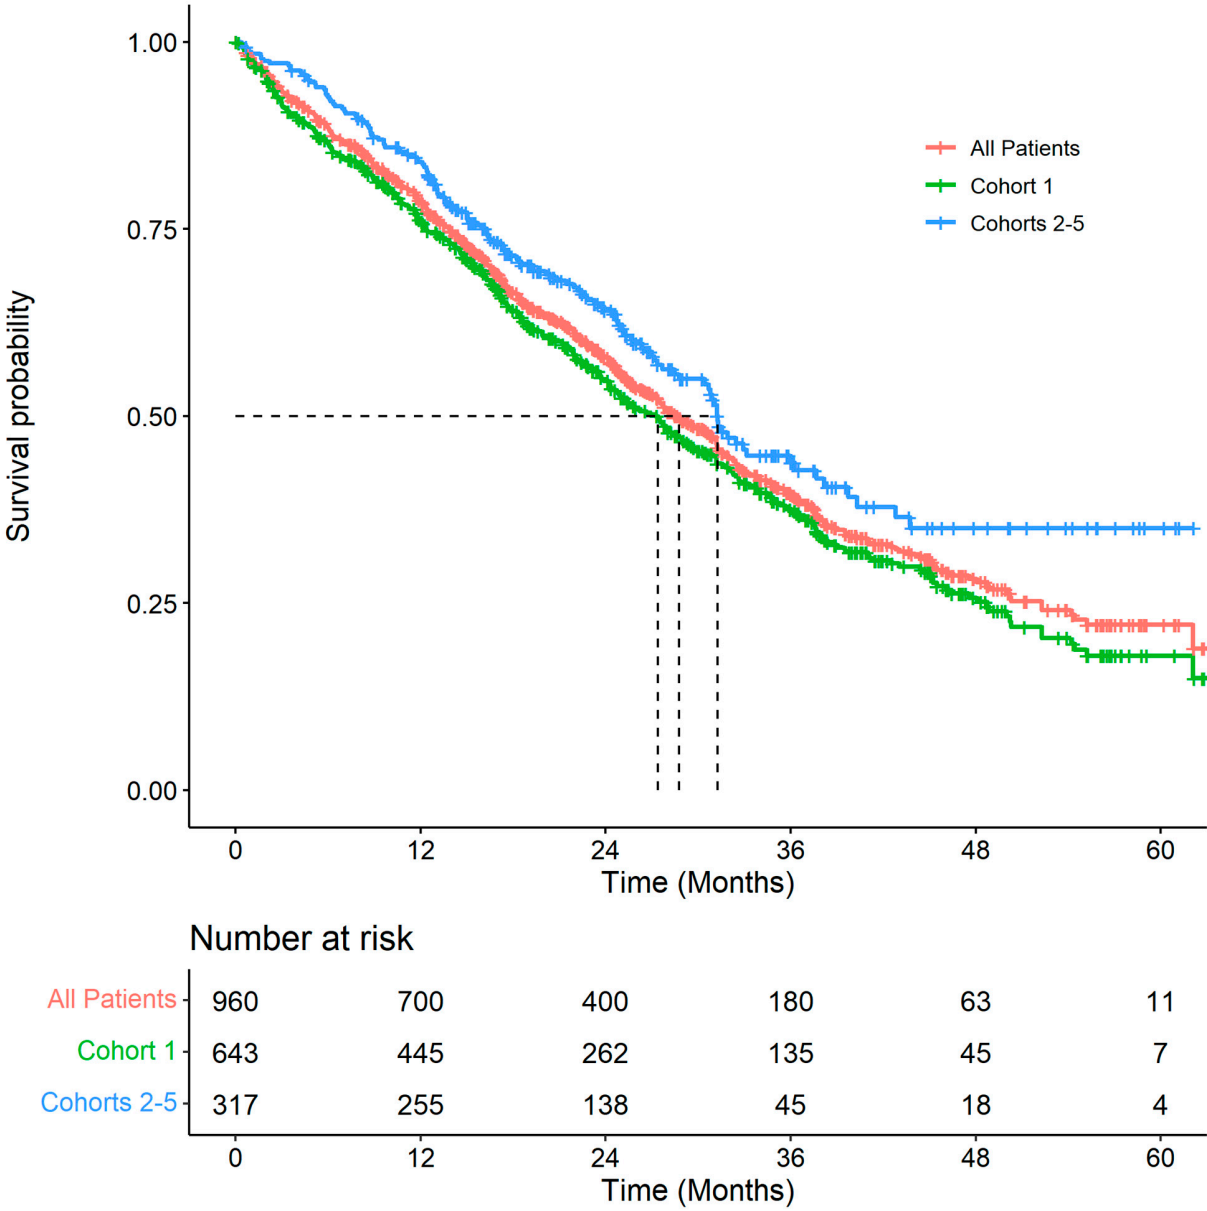

Supplement: s1 [file s1]
